# Supplementary material for: Synthesis of core–shell magnetic titanate nanofibers composite for the efficient removal of Sr(ii)
Source: Royal Society of Chemistry journal article supplement (doi:10.1039/c9ra06148g), 2019-01-01
Supplement: c9ra06148g1.pdf [file c9ra06148g1.pdf]

Electronic Supporting Information for

## Synthesis of core-shell magnetic titanate nanofibers composite for the efficient removal of Sr(II)

*Rong Yi,<sup>1\*</sup> Gang Ye<sup>2</sup> and Jing Chen<sup>2\*</sup>*

<sup>1</sup> *School of Material Science and Engineering, Sun Yat-Sen University, Guangzhou 510275, China*

<sup>2</sup> *Institute of Nuclear and New Energy Technology (INET), Tsinghua University, Beijing 100084, China*

\*Corresponding authors, e-mail: yirong280@163.com, jingxia@mai.tsinghua.edu.cn

### Contents

#### Supporting Figures

|         |                                                                                                                                                 |     |
|---------|-------------------------------------------------------------------------------------------------------------------------------------------------|-----|
| Fig. S1 | N <sub>2</sub> adsorption-desorption isotherms and pore size distribution of Fe <sub>3</sub> O <sub>4</sub> /titanate composite                 | S-2 |
| Fig. S2 | EDS spectrum of Fe <sub>3</sub> O <sub>4</sub> /titanate composite                                                                              | S-3 |
| Fig. S3 | TEM image of Fe <sub>3</sub> O <sub>4</sub> @TiO <sub>2</sub> microspheres and its product after hydrothermal treatment with 10 M NaOH solution | S-4 |
| Fig. S4 | XPS high resolution of O1s before Sr(II) treatment                                                                                              | S-5 |
| Fig. S5 | XPS high resolution of O1s before and after Sr(II) treatment                                                                                    | S-6 |

#### Supporting Table

|          |                                                                                                   |     |
|----------|---------------------------------------------------------------------------------------------------|-----|
| Table S1 | Structure parameters of Fe <sub>3</sub> O <sub>4</sub> /titanate nanofiber composite              | S-2 |
| Table S2 | Element composition for Fe <sub>3</sub> O <sub>4</sub> /titanate nanofibers by using EDS analysis | S-3 |
| Table S3 | Parameters of adsorption isotherms fitted by Langmuir and Freundlich models                       | S-7 |
| Table S4 | Desorption performance with various conditions of elution                                         | S-8 |

## Supporting Figures

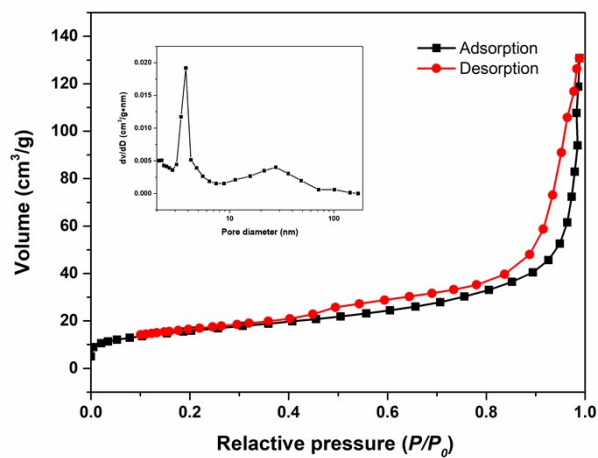

**Fig. S1** N<sub>2</sub> adsorption-desorption isotherms and pore size distribution of Fe<sub>3</sub>O<sub>4</sub>/titanate nanofiber composite

Table S1 Structure parameters of Fe<sub>3</sub>O<sub>4</sub>/titanate nanofiber composite

| Sample                                             | S <sub>BET</sub> (m <sup>2</sup> /g) | Pore Volume(cm <sup>3</sup> /g) | Average pore width(nm) |
|----------------------------------------------------|--------------------------------------|---------------------------------|------------------------|
| Fe <sub>3</sub> O <sub>4</sub> /titanate nanofiber | 56.7                                 | 0.2                             | 14.3                   |

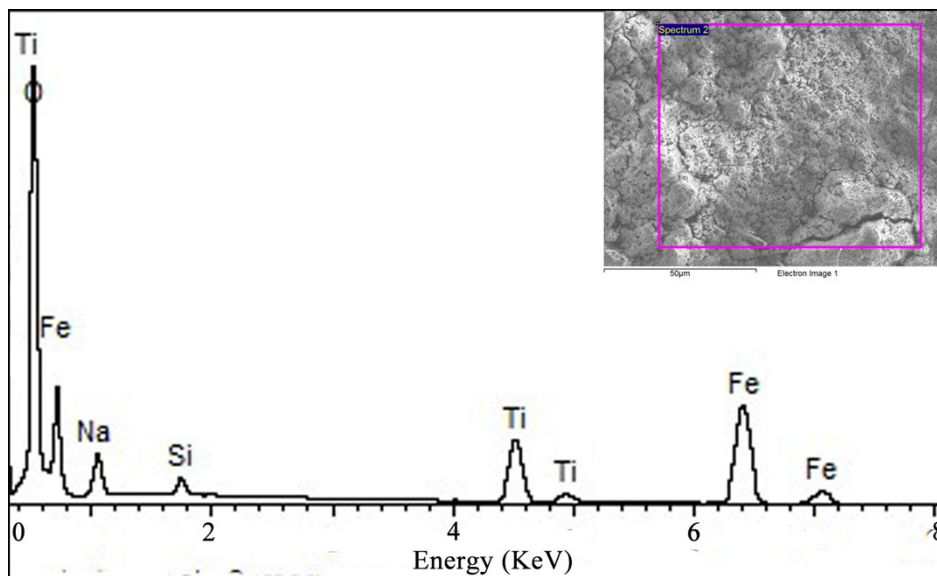

**Fig. S2.** EDS spectrum of Fe<sub>3</sub>O<sub>4</sub>/titanate composite

Table S2 Element composition for Fe<sub>3</sub>O<sub>4</sub>/titanate nanofibers by using EDS analysis

| Element | Weight% | Atomic% |
|---------|---------|---------|
| C K     | 28.13   | 43.29   |
| O K     | 38.14   | 44.07   |
| Na K    | 2.01    | 1.62    |
| Si K    | 0.55    | 0.36    |
| Ti K    | 6.38    | 2.46    |
| Fe K    | 24.78   | 8.20    |
| Totals  | 100.00  |         |

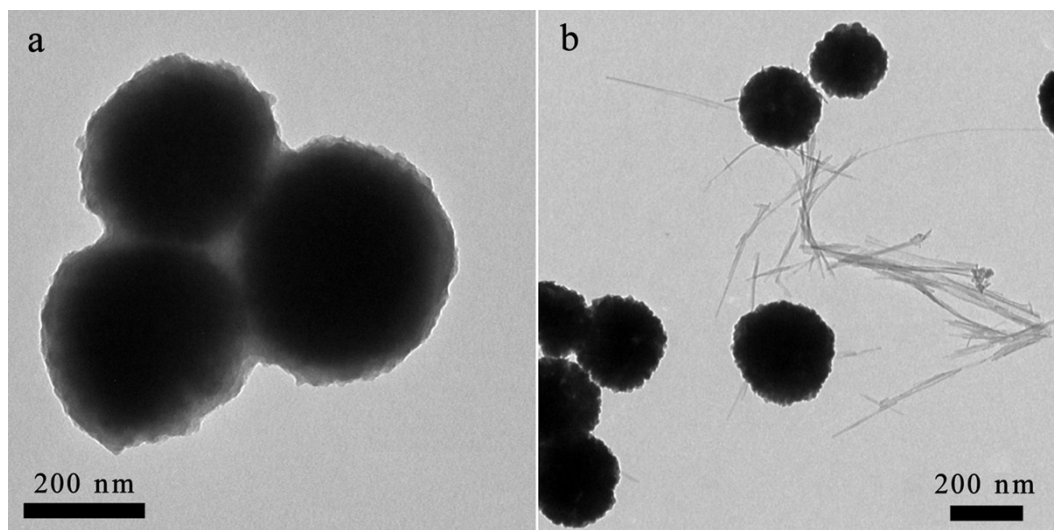

**Fig. S3** TEM image of  $\text{Fe}_3\text{O}_4@\text{TiO}_2$  microspheres and its product after hydrothermal treatment in 10 M NaOH solution

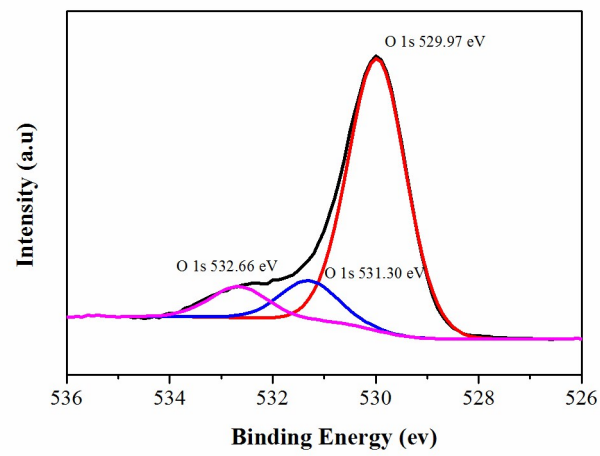

**Fig. S4** XPS high resolution of O1s before Sr(II) treatment

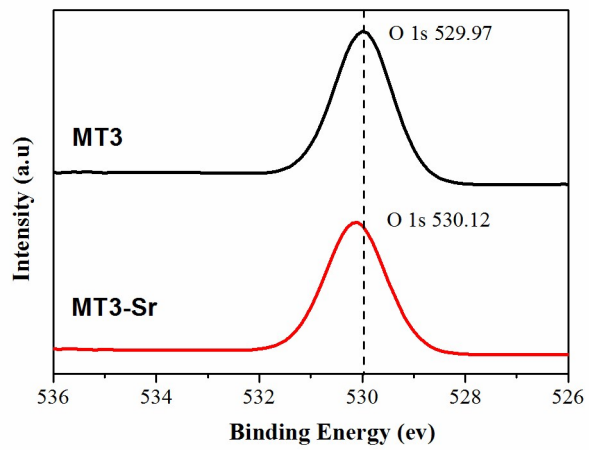

**Fig. S5** XPS high resolution of O1s before and after Sr(II) treatment

**Table S3.** Parameters of adsorption isotherms fitted by Langmuir and Freundlich models

| Langmuir model |                  |       | Freundlich model |       |       |
|----------------|------------------|-------|------------------|-------|-------|
| $K_L$ (L/mg)   | $q_{max}$ (mg/g) | $R^2$ | $K_F$            | $n$   | $R^2$ |
| 509.58         | 39.08            | 0.931 | 44.36            | 10.99 | 0.557 |

Table S4 Desorption performance with various conditions of elution

| No. | Mass of adsorbent(mg) | $C_{Sr(II)}$ (g/L) | $q_e$ (mg/g) | Eluent       | $V_{Eluent}$ (mL) | Desorption rate(%) |
|-----|-----------------------|--------------------|--------------|--------------|-------------------|--------------------|
| 1   | 10                    | 0.2                | 36.2         | 5% Thiourea  | 2                 | 14.1               |
| 2   | 10                    | 0.2                | 36.5         | 5% Thiourea  | 4                 | 18.5               |
| 3   | 10                    | 0.2                | 36.3         | 5% EDTA(2Na) | 2                 | 90.3               |
| 4   | 10                    | 0.2                | 35.9         | 5% EDTA(2Na) | 4                 | 92.2               |
